# Supplementary material
Source: PubMed Central journal article supplement (PMC5341702)
Supplement: mp6b01130_si_001.pdf [file mp6b01130_si_001.pdf]

## Supporting Information

# Preloading with the unlabeled CA19.9 targeted human monoclonal antibody leads to improved PET imaging with $^{89}\text{Zr-5B1}$

Jacob L. Houghton<sup>†&</sup>, Dalya Abdel-Atti<sup>†</sup>, Wolfgang W. Scholz<sup>‡</sup>, and Jason S. Lewis<sup>†§\*</sup>

<sup>†</sup> Department of Radiology, Memorial Sloan Kettering Cancer Center, New York, New York

<sup>‡</sup> MabVax Therapeutics, San Diego, California

<sup>§</sup> Molecular Pharmacology Program, Memorial Sloan Kettering Cancer Center, New York, New York

<sup>&</sup> Present address: Department of Radiology and Radiological Sciences, Vanderbilt University Medical Center, Nashville, Tennessee

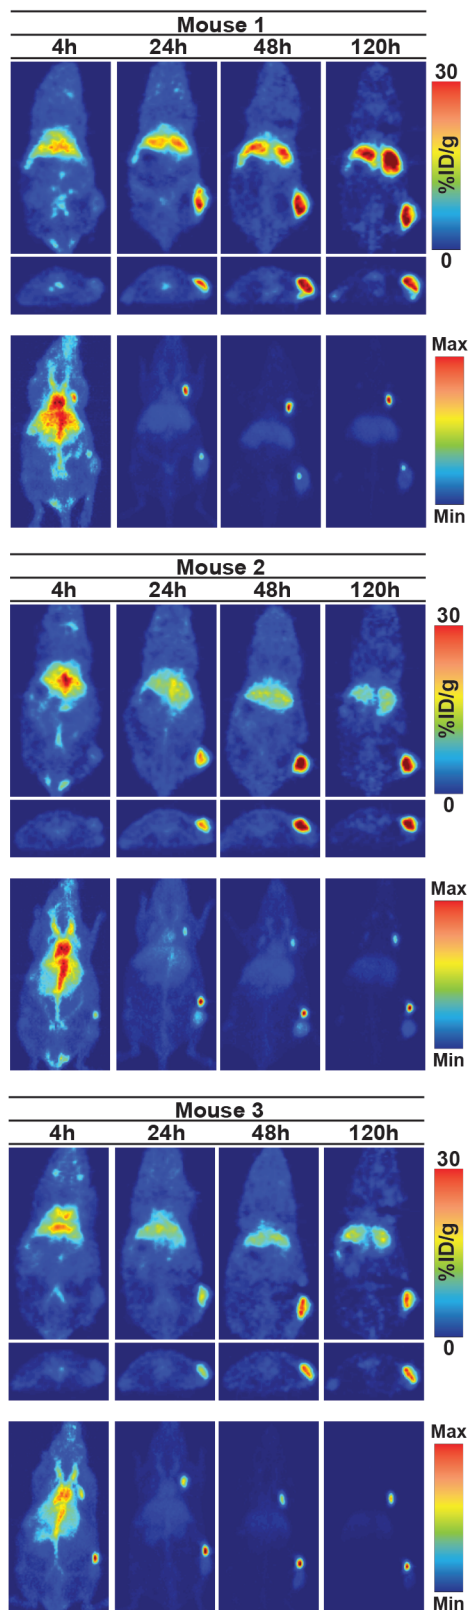

**Figure S1.** Serial PET images of three mice injected with  $^{89}\text{Zr}$ -5B1 without preloading of unlabeled 5B1. Tomographic slices (top panels) and maximum intensity projections (bottom panels) are shown for images acquired between 4h and 120h post injection.

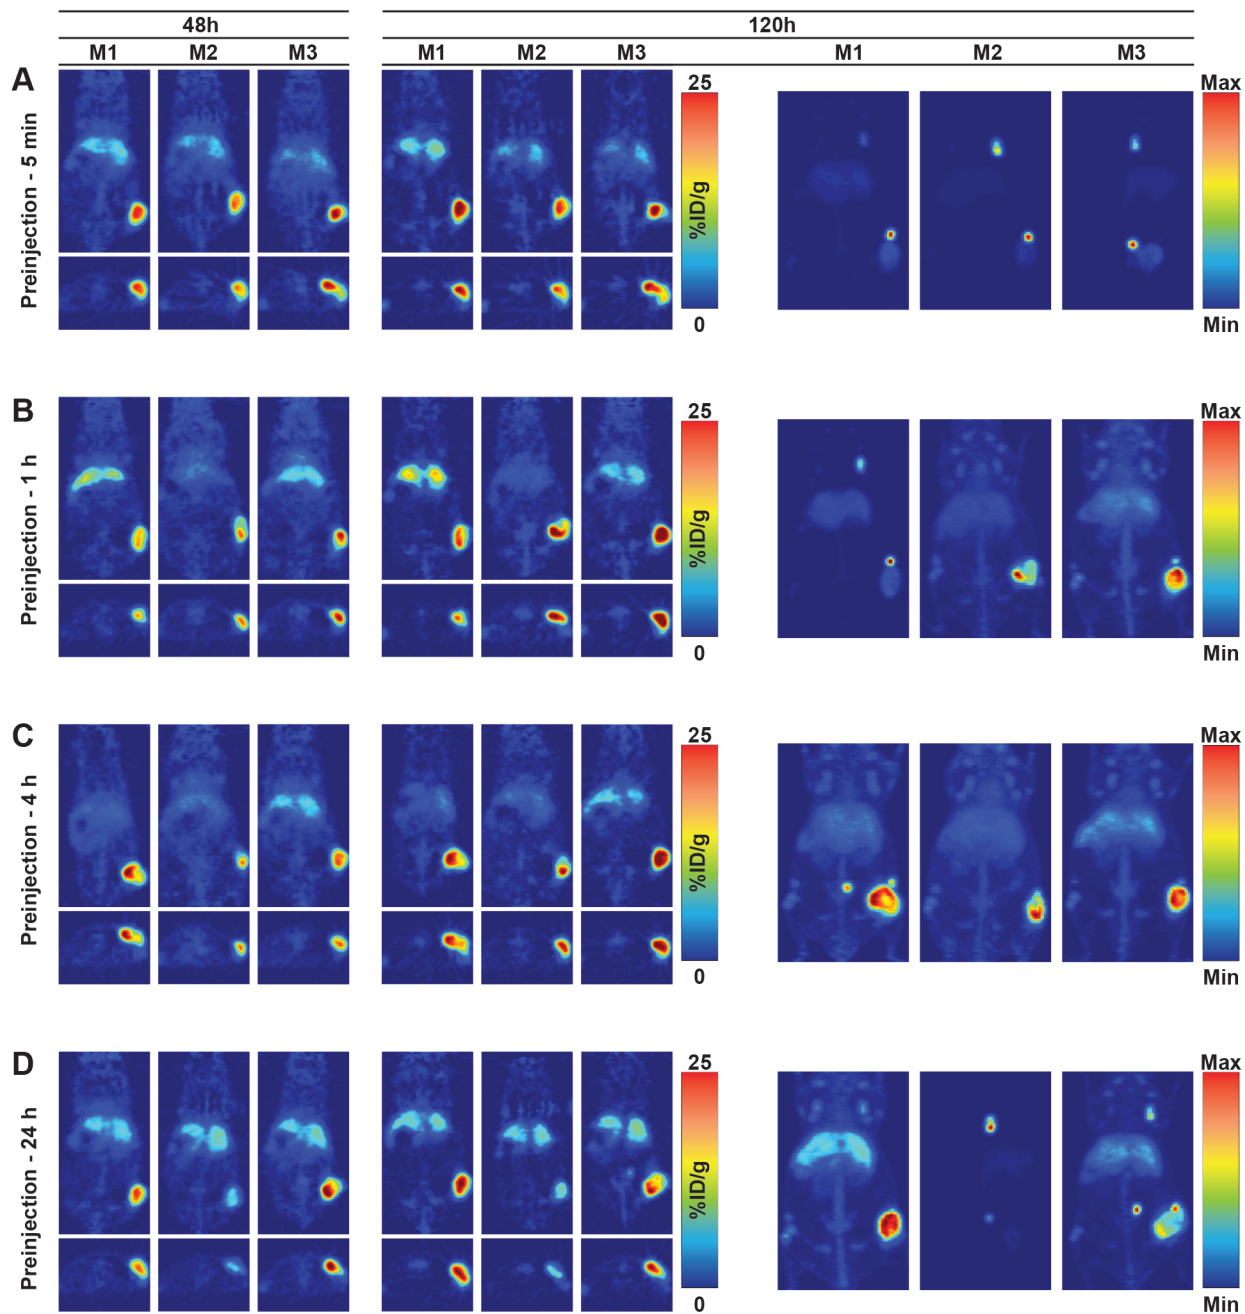

**Figure S2.** PET images of mice ( $n = 3$  per group) that were administered  $^{89}\text{Zr}$ -5B1 after preloading with unlabeled 5B1 at 5min (A), 1h (B), 4h (C), or 24h (D) prior to injection or the tracer. Tomographic slices obtained at 48h and 120h post injection as well as maximum intensity projections from 120h are shown.

**Table S1.** Activity concentrations (%ID/g) and tumor to tissue ratios of mice (n = 4-5 per group) from a biodistribution study in which mice received <sup>89</sup>Zr-5B1 without preloading or with preloading of unlabeled 5B1 5m to 24h prior to tracer administration.

| Organ           | <sup>89</sup> Zr-5B1 uptake (%ID/g) |            |             |             |            | Tumor to tissue ratios |             |             |             |             |
|-----------------|-------------------------------------|------------|-------------|-------------|------------|------------------------|-------------|-------------|-------------|-------------|
|                 | No cold                             | 5m         | 1h          | 4h          | 24h        | No cold                | 5m          | 1h          | 4h          | 24h         |
| Blood           | 3.3 ± 1.3                           | 3.8 ± 1.3  | 4.9 ± 1.8   | 4.7 ± 1.4   | 2.0 ± 0.8  | 7.9 ± 3.3              | 8.3 ± 3.2   | 7.4 ± 3.9   | 9.0 ± 4.2   | 10.9 ± 6.4  |
| Tumor           | 25.8 ± 4.4                          | 31.5 ± 5.8 | 36.1 ± 13.2 | 42.2 ± 14.9 | 22.2 ± 9.6 | --                     | --          | --          | --          | --          |
| Heart           | 1.5 ± 0.4                           | 1.3 ± 0.4  | 1.7 ± 0.6   | 1.7 ± 0.4   | 0.8 ± 0.2  | 17.8 ± 5.3             | 24.3 ± 9.5  | 20.8 ± 10.3 | 25.2 ± 10.9 | 28.3 ± 14.2 |
| Lungs           | 2.5 ± 0.8                           | 2.6 ± 0.7  | 3.2 ± 1.0   | 3.2 ± 0.9   | 1.6 ± 0.5  | 10.5 ± 3.7             | 12.1 ± 4.1  | 11.3 ± 5.5  | 13.2 ± 5.9  | 14.1 ± 7.5  |
| Liver           | 17.7 ± 6.0                          | 8.8 ± 2.7  | 10.3 ± 5.8  | 6.7 ± 1.3   | 11.7 ± 3.2 | 1.5 ± 0.6              | 3.6 ± 1.3   | 3.5 ± 2.4   | 6.3 ± 2.6   | 1.9 ± 1.0   |
| Spleen          | 14.5 ± 5.6                          | 6.2 ± 3.0  | 7.0 ± 2.3   | 5.4 ± 1.2   | 7.2 ± 0.9  | 1.8 ± 0.8              | 5.1 ± 2.6   | 5.2 ± 2.5   | 7.9 ± 3.3   | 3.1 ± 1.4   |
| Pancreas        | 0.7 ± 0.2                           | 0.7 ± 0.1  | 0.8 ± 0.2   | 0.9 ± 0.2   | 0.4 ± 0.1  | 35.5 ± 13.5            | 46.6 ± 12.5 | 42.5 ± 19.1 | 48.7 ± 19.6 | 51.9 ± 24.1 |
| Stomach         | 0.6 ± 0.2                           | 0.5 ± 0.2  | 0.4 ± 0.1   | 0.4 ± 0.2   | 0.2 ± 0.1  | 42.4 ± 15.0            | 59.2 ± 21   | 80.3 ± 37.7 | 97.7 ± 59.9 | 112 ± 49    |
| Small Intestine | 0.5 ± 0.1                           | 0.6 ± 0.2  | 0.7 ± 0.2   | 0.5 ± 0.1   | 0.3 ± 0.1  | 49.9 ± 13.0            | 48.5 ± 18.6 | 51.9 ± 22.8 | 88.0 ± 39.0 | 76.5 ± 34.7 |
| Large Intestine | 0.5 ± 0.2                           | 0.5 ± 0.1  | 0.6 ± 0.1   | 0.7 ± 0.2   | 0.3 ± 0.1  | 49.1 ± 18.7            | 66.5 ± 18.1 | 64.8 ± 28.3 | 63.7 ± 28.8 | 72.8 ± 32.1 |
| Kidneys         | 3.4 ± 1.1                           | 3.2 ± 0.7  | 3.3 ± 0.5   | 3.6 ± 0.7   | 2.4 ± 0.3  | 7.6 ± 2.8              | 9.8 ± 2.8   | 11.0 ± 4.4  | 11.9 ± 4.8  | 9.2 ± 4.2   |
| Muscle          | 2.9 ± 0.5                           | 5.0 ± 0.6  | 5.3 ± 2.8   | 4.7 ± 0.7   | 4.1 ± 1.0  | 9.0 ± 2.3              | 6.3 ± 1.4   | 6.8 ± 4.4   | 8.9 ± 3.4   | 5.4 ± 2.7   |
| Bone            | 1.4 ± 0.9                           | 0.5 ± 0.1  | 0.5 ± 0.2   | 0.5 ± 0.1   | 0.7 ± 0.9  | 9.0 ± 6.0              | 67.7 ± 16.7 | 66.1 ± 33.2 | 85.6 ± 34.8 | 31.8 ± 43.0 |

**Table S2.** Tumor to tissue ratios from a biodistribution study in which mice (n = 4-5 per group) received <sup>89</sup>Zr-5B1 4h after preloading with various amounts (40-250 µg) of unlabeled 5B1.

| Organ           | 100 µg     |             |             |              | 40 µg       | 250 µg      |
|-----------------|------------|-------------|-------------|--------------|-------------|-------------|
|                 | 24h        | 48h         | 72h         | 120h         | 120h        | 120h        |
| Blood           | 1.9 ± 0.4  | 3.2 ± 0.9   | 3.9 ± 1.7   | 9.8 ± 5.5    | 9.3 ± 3.9   | 9.8 ± 5.1   |
| Heart           | 6.7 ± 2    | 11.2 ± 2.8  | 13.9 ± 4.9  | 30.3 ± 15.7  | 26.5 ± 10   | 30.1 ± 14.6 |
| Lungs           | 3.2 ± 1.3  | 6.7 ± 2.1   | 8.6 ± 3.7   | 16.7 ± 7.7   | 14.8 ± 5.6  | 13.1 ± 7.1  |
| Liver           | 3.4 ± 0.9  | 4.1 ± 1.3   | 3 ± 1.7     | 3.1 ± 1.5    | 2.7 ± 1.3   | 4.2 ± 2.2   |
| Spleen          | 4.7 ± 1.8  | 6.6 ± 2.3   | 7.5 ± 2.9   | 5.6 ± 2.6    | 3.8 ± 2.7   | 7.2 ± 3.4   |
| Pancreas        | 22.6 ± 4.9 | 34.5 ± 7.6  | 34.1 ± 11.9 | 68.3 ± 30.1  | 66.1 ± 21.1 | 66.3 ± 31.3 |
| Stomach         | 36.1 ± 9.8 | 42.3 ± 14   | 38.9 ± 15.7 | 100.3 ± 45.7 | 67.6 ± 29.7 | 83.4 ± 40.2 |
| Small Intestine | 21.1 ± 4.4 | 34.6 ± 13   | 33.1 ± 17.2 | 69.2 ± 34.9  | 61.1 ± 20   | 69.4 ± 35.9 |
| Large Intestine | 33.9 ± 9.1 | 51.7 ± 13.2 | 37.7 ± 15.8 | 88.5 ± 32.1  | 76.7 ± 24.7 | 81.1 ± 41.9 |
| Kidneys         | 3.4 ± 1.9  | 7 ± 1.4     | 6 ± 2.4     | 10.8 ± 4     | 10.5 ± 2.9  | 11.6 ± 5.7  |
| Muscle          | 27.4 ± 6   | 44 ± 12.1   | 42.2 ± 14.9 | 108.5 ± 56.1 | 70.7 ± 26.4 | 90.2 ± 44.2 |
| Bone            | 6.1 ± 1.6  | 7 ± 1.8     | 6.1 ± 3.3   | 6.7 ± 2      | 6.3 ± 1.7   | 6.6 ± 3.1   |
